# Supplementary material for: The Epidemiology of Malaria in Kutubu, Southern Highlands Province, Papua New Guinea, before and during a Private Sector Initiative for Malaria Control
Source: MDPI journal article supplement (doi:10.3390/tropicalmed2010002), 2017-02-10
Supplement: s1 [file s1]

# Supplementary Materials: The Epidemiology of Malaria in Kutubu, Southern Highlands Province, Papua New Guinea, before and during a Private Sector Initiative for Malaria Control

Marshall Feterl, Patricia Graves, Liesel Seehofer, Jeffery Warner, Peter Wood, Kevin Miles and Ross Hutton

## Methods

Original RDT and microscopy records were categorized as follows before collapsing for analysis:

*Original RDT results were recorded as follows:*

|          |                                                                                                                                  |
|----------|----------------------------------------------------------------------------------------------------------------------------------|
| Pf       | any <i>P. falciparum</i> positive infection                                                                                      |
| Pf mixed | any <i>P. falciparum</i> positive infection mixed with any other species                                                         |
| P other  | any <i>P. vivax</i> , <i>P. malariae</i> or <i>P. ovale</i> infection or a mixture of these non- <i>P. falciparum</i> infections |
| Negative | any negative result                                                                                                              |
| Invalid  | any invalid RDT                                                                                                                  |
| nil      | no result recorded                                                                                                               |

*Original microscopy results were recorded as follows:*

|            |                                                                  |
|------------|------------------------------------------------------------------|
| Pf         | any <i>P. falciparum</i> positive infection                      |
| Pf Gam     | any <i>P. falciparum</i> positive infection with gametocytes     |
| Pv         | any <i>P. vivax</i> infection                                    |
| Pm         | any <i>P. malariae</i> infection                                 |
| Po         | any <i>P. ovale</i> infection                                    |
| Pf + Pv    | <i>P. falciparum</i> infection with <i>P. vivax</i> infection    |
| Pf + Pm    | <i>P. falciparum</i> infection with <i>P. malariae</i> infection |
| Pf + Po    | <i>P. falciparum</i> infection with <i>P. ovale</i> infection    |
| Pv + Pm    | <i>P. vivax</i> infection with <i>P. malariae</i> infection      |
| Negative   | no infection                                                     |
| unreadable | unreadable or broken slide                                       |
| nil        | no record or missing result                                      |
